# Supplementary material for: Multiplex microRNA imaging in living cells using DNA-capped-Au assembled hydrogels
Source: PubMed Central journal article supplement — Chem Sci. 2018 Aug 7;9(37):7419–25. doi: 10.1039/c8sc02858c (PMC6237120; doi:10.1039/c8sc02858c), 2018-08-07
Supplement: SC-009-C8SC02858C-s001.pdf [file SC-009-C8SC02858C-s001.pdf]

## Supporting Information

### **Multiplex MicroRNAs Imaging in Living Cell Using DNA-Capped-Au Assembled Hydrogels**

*Xiangdan Meng, Kai Zhang, Wenhao Dai, Yu Cao, Fan Yang, Haifeng Dong\* and Xueji Zhang\**

Non-invasively imaging multiplex microRNAs (miRNAs) in living cells is pivotal to understand the physiological functions and pathological development due to key regulator roles of miRNA in gene expression. However, smart delivery system with large gene loading capacity, biocompatibility and responsiveness remains a significant challenge. Herein, we successfully incorporate DNA-capped Au nanoparticles (NPs) and their complementary fluorescent DNA sequences into a porous 3D hydrogel network (AuDH), in which hairpin-locked DNzyme and active metal ions were loaded (AuDH/M<sup>n+</sup>/H) for simultaneously imaging multiplex miRNA in living cells. After transfecting into cells, the specific miRNA trigger the strand-displacement reaction and sequentially activate the DNzyme-assisted target recycling, leading to strong increase in corresponding fluorescence intensity for imaging. It enables to simultaneously assess multiplex cancer-related miRNAs abundance, even if at a very low expression level, in different cells through the different fluorescence intensities due to the dual signal amplification, and abundance change of miRNA induced by siRNA or mimic miRNAs in living cells can also be efficiently monitored. The versatile and responsive DNA hydrogel system holds great potential for miRNA biomedical application.

[\*] X. Meng, K. Zhang, W. Dai, Y. Cao, F. Yang, Prof. Dr. H. Dong, Prof. Dr. X. Zhang

Beijing Advanced Innovation Center for Materials Genome Engineering

University of Science and Technology Beijing

30 Xueyuan Road, Beijing 100083 (P. R. China)

E-mail: zhangxueji@ustb.edu.cn or [hfdong@ustb.edu.cn](mailto:hfdong@ustb.edu.cn)

X. Meng, K. Zhang, W. Dai, Y. Cao, F. Yang, Prof. Dr. H. Dong, Prof. Dr. X. Zhang

Beijing Key Laboratory for Bioengineering and Sensing Technology, Research Center for  
Bioengineering and Sensing Technology

School of Chemistry and Biological Engineering, University of Science & Technology Beijing

30 Xueyuan Road, Beijing 100083 (P. R. China)

E-mail: [hfdong@ustb.edu.cn](mailto:hfdong@ustb.edu.cn) and [zhangxueji@ustb.edu.cn](mailto:zhangxueji@ustb.edu.cn)

## Materials and reagents:

Copper (II) chloride dihydrate ( $\text{CuCl}_2 \cdot 2\text{H}_2\text{O}$ ), magnesium chloride hexahydrate ( $\text{MgCl}_2 \cdot 2\text{H}_2\text{O}$ ), zinc chloride ( $\text{ZnCl}_2$ ) and trisodium citrate dihydrate were purchased from Sinopharm Chemical Reagent Co., Ltd (Shanghai, China). Tetrachloroauric acid ( $\text{HAuCl}_4$ ) was provided by Toronto Research Chemicals Inc. (Toronto, Canada). All the reagents were of analytical reagent grade. Ultrapure water generated from the Millipore Milli-Q water purification system (Billerica, MA, USA) was used in all experiments. Phosphate-buffered saline (PBS, pH 7.4, 10 mM, 137 mM NaCl), Dulbecco's modified Eagle's medium (DMEM) and fetal bovine serum (FBS) were provided by Life Technologies Corporation (Los Angeles, CA, USA). The oligonucleotides strands in our experiments were obtained by Sangon Biological Engineering Technology & Services Co., Ltd. (Shanghai, China). All of the nucleotides strands were purchased from GenePharma (Shanghai, China) and diluted in diethyl pyrocarbonate (DEPC) water for further use. The sequences were presented as follows:

Sequences of DNA strands (5' - to 3'-):

P1 (for miR-21):

TACTCTCGGrATCAACATCAGTCTGATAAGCTA

H1 ( $\text{Cu}^{2+}$ , for miR-21):

CTTATCAGACTGATGTTGATGGGCCTCTTTCTTTTTAAGCGAGAGTATCTTT  
TTCAGTCTGATAAG

P2 (for miR-373):

ACTACTAGGrATACACCCCAAATCGAAGCACTTC

H2 ( $\text{Mg}^{2+}$ , for miR-373):

GCTTCGATTTTGGGGTGTACAGCGATTCCGGAACGGACACCCATGTCTAG  
TAGTTACTTTTCAAATCGAAGC

P3 (for miR-155):

ATCACTGGGrATCCCCTATCACGATTAGCATTAA

H3 ( $\text{Zn}^{2+}$ , for miR-155):

ATGCTAATCGTGATAGGGGACTCCGAGCCGGTCGAAACAGTGATTCCCTTT  
TTCACGATTAGCAT

T1:

GGTGTACTAGTAGTAATTGACGAGAGTAAAAG\*G\*G\*G\*G\*T\*G\*G\*G\*G\*  
G\*AAATAGCTTATCAGA CAAGAAGTGCTTCGA T

T2:

TTAATGCTAATCGAAGGTGTACTAGTAGTAAAG\*G\*G\*G\*G\*T\*G\*G\*G\*G\*  
G\*AAAGAAGTGCTTCGATAAGGGG ACCAGTGAT

T3:

TTGACGAGAGTAAAGGGGACCAGTGATAAAG\*G\*G\*G\*G\*T\*G\*G\*G\*G\*G  
\*AAATAGCTTATCAGACAATTAATGCTAATCG

P1 for agarose gel electrophoresis:

TACTCTC GGAT CAA CAT CA G TCT GAT AAG CTA

P2 for agarose gel electrophoresis:

ACTACTA GGAT AC ACC CCA AA A TCG AAG CAC TTC

P3 for agarose gel electrophoresis:

ATCACTG GGAT C CCC TAT CA C GAT TAG CAT TAA

T1 for agarose gel electrophoresis:

GGT GT AC TAGTAGTAA TTG A C GAGAGTA

T2 for agarose gel electrophoresis:

TTA ATG CTA ATC G AA GGT GT A C TAGTAGT

T3 for agarose gel electrophoresis:

TTG AC GAGAGTA AA GGG G A C CAGTGAT

**Note: The red portion refers to ribonuclease-modified site. The basic groups with \* indicate phosphorothioate linkage.**

Sequences of RNA strands (5'- to 3'-):

miR-21: UAG CUU AUC AGA CUG AUG UUG A

miR-21 mimics (double strands):

UAGCUUAUCAGACUG AUGUUGA/AACAUCAGUCUGAUAAGCUUC

miR-21 inhibitor (signal strand): UCAACAUCAGUCUGAUAAGCUA

miR-373: GAA GUG CUU CGA UUU UGG GGU GU

miR-373 mimics (double strands):

GAAGUGCUUCGAUUUUGGGGUGU/ACCCCAAAAUCGAAGCACUUCU

miR-373 inhibitor (signal strand): ACACCCCAAAAUCGAAGCACUUC

miR-155: UUA AUG CUA AUC GUG AUA GGG G

miR-155 mimics (double strands):

UUA AUGCUAAUCGUGAUAGGGG/CCUAUCCACGAUUAGCAUUAUU

miR-155 inhibitor (signal strand): CCCCUAUCACGAUUAGCAUUA

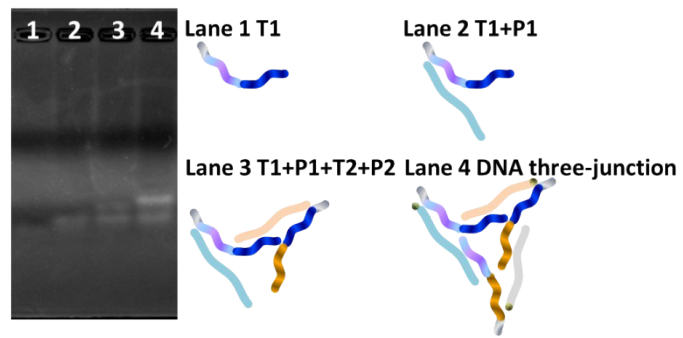

**Fig. S1.** The assemble process of DNA three-junction for constructing the AuDH.

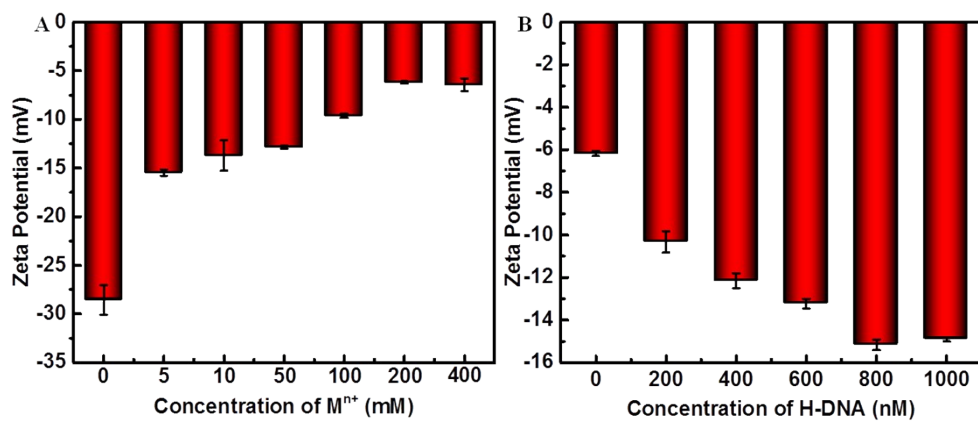

**Fig. S2.** The loading capacities of AuDH for metal ions (A) and hairpin-locked DNAzyme strands (B).

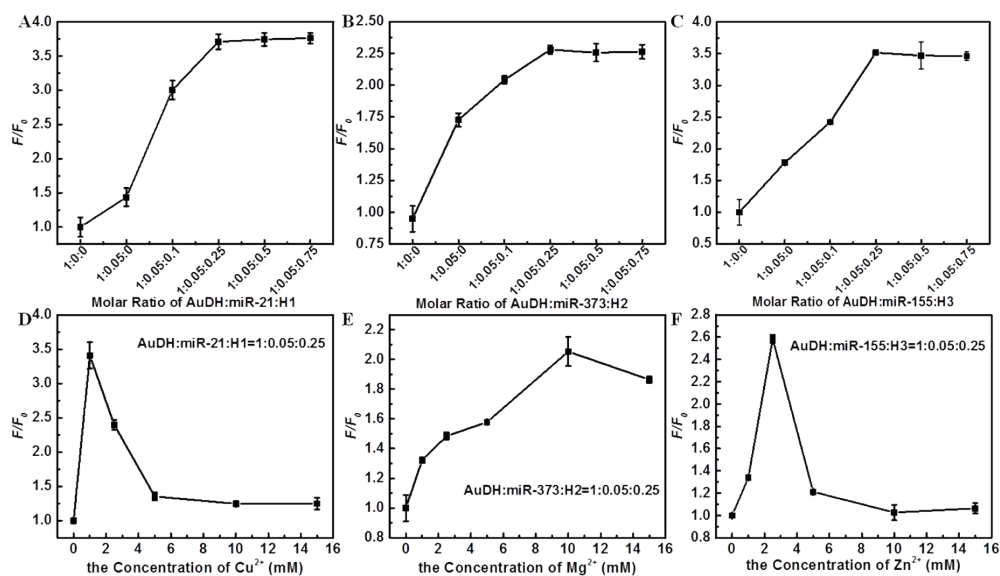

**Figure S3.** (A-C) The influence of H to miRNAs detection in the conditions that the concentrations of the AuDH, miRNA and metal irons were 0.5 mM, 0.025 mM and 5 mM, respectively. (D-F) The influence of metal irons ( $Cu^{2+}$ ,  $Mg^{2+}$  and  $Zn^{2+}$ ) to miRNAs detection in the conditions that the concentrations of the AuDH, miRNA and H were 0.5 mM, 0.025 mM and 0.125 mM, respectively.

As shown in **Figure S3A-C**, the molar ratio of AuDH and target miRNA was fixed at 1:0.05 and the concentrations of metal irons were all chosen as 5 mM. The ratio of  $F$  and  $F_0$  ( $F_0$ , the fluorescence intensity of AuDH/ $M^{n+}$ ) increased long with the increase of hairpin-locked DNAzyme strands concentration and reached to a plateau when the molar ratio of AuDH:miRNA:H was 1:0.05:0.25. The concentrations of  $Cu^{2+}$ ,  $Mg^{2+}$  and  $Zn^{2+}$  were also optimized under the conditions that the molar ratio of AuDH, target miRNA and hairpin-locked DNAzyme strands was 1:0.05:0.25. The optimal concentration of  $Cu^{2+}$ ,  $Mg^{2+}$  and  $Zn^{2+}$  was 1 mM, 10 mM and 2.5 mM (**Figure S3D-F**).

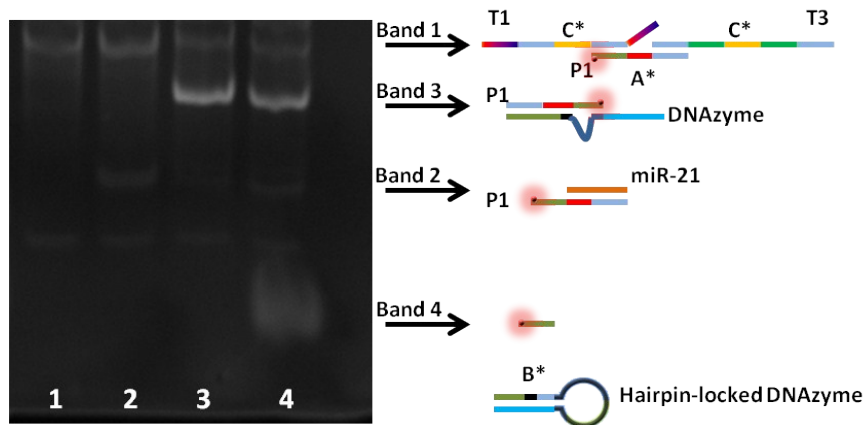

**Fig. S4** The polyacrylamide gel electrophoresis presenting the feasibility of the strand-displacement reaction and hairpin-locked DNAzyme-assisted dual-signal amplification. Lane 1: T1-P1-P3; Lane 2: T1-P1-P3 and miR-21; Lane 3: T1-P1-P3, miR-21 and H1; Lane 4: T1-P1-P3, miR-21, H1 and  $\text{Cu}^{2+}$ .

miRNA-21: UAG CUU AUC AGA C UG AUG UUG A

P1: FAM-TACTCTC GGrAT CAA CAT CA G TCT GAT AAG CTA

H1 (Hairpin-locked DNAzyme):

*CTTATCAGACTGATGTTGATGGGCCTCTTTCTTTTAAAGCGAGAGTATCTTTT  
TCAGTCTGATAAG*

In the absence target, the P1 strand in the T1-P1-T3 structure just has two bases (the red letters with underline) available for H1 recognition, which could not effectively induce the hybridization and displacement reaction to form the DNAzyme for  $\text{Cu}^{2+}$  recognition. In presence of target miR-21, P1 hybridized with miR-21 through the site of miR-21 recognition (the red letters, 5 bases) to form P1/miRNA-21 duplex structure and expose the site (the green letters, 8 bases) for effective H1 recognition on the P1 strand.

As shown in **Fig. S4**, polyacrylamide gel electrophoresis analysis was performed to verify the dual signal amplification. The T1-P1-T3 structure was formed by the annealing of T1, P1 and T3 strands, resulting in a band (top in Lane 1) with a high molecular weight (MW). In the presence of target miR-21, the P1 hybridized with miR-21 (band 2, Lane 2). When the H1 was added into the mixture of miR-21 and T1-P1-T3 (Lane 3), an obvious new band was obtained (band 3). The adding of miR-21,



H1 and  $\text{Cu}^{2+}$  (Lane 3) into T1-P1-T3, the lowest band (band 4) was clearly observed in Lane 4, which was assigned to DNA fragment from hairpin-locked DNzyme nicking.

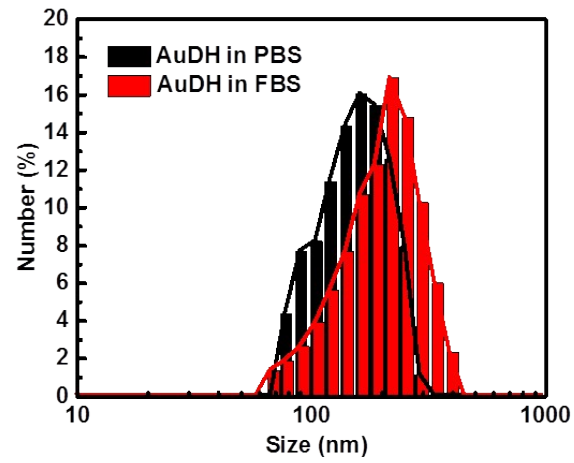

**Fig. S5** DLS of AuDH in PBS (pH 7.4, 10 mM) and in FBS, respectively

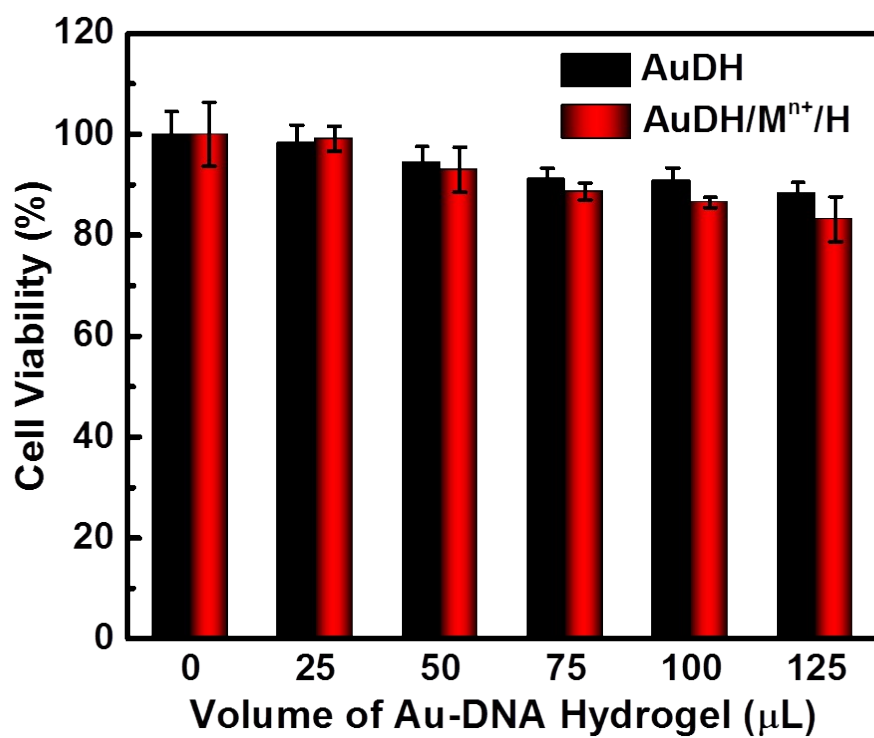

**Fig. S6** The cytotoxicity of MCF-7 cells incubated with different volume of hydrogels (0-125 μL) in DMEM.

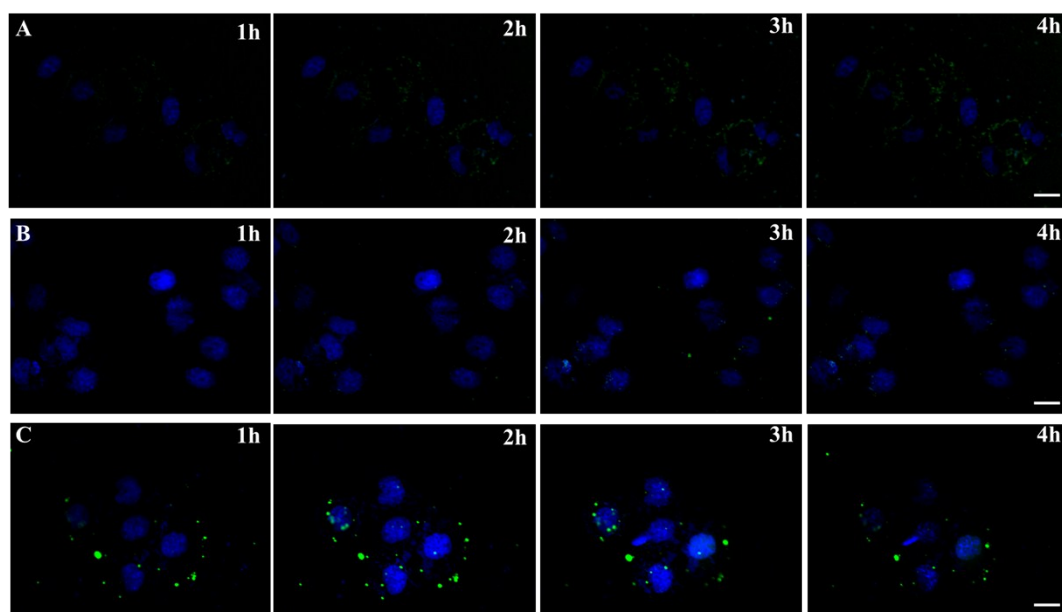

**Fig. S7** The cellular uptake of the prepared AuDH (A), DNA-hydrogels (B) and commercial Lipofectamine®2000 (C) in MCF-7 cells.

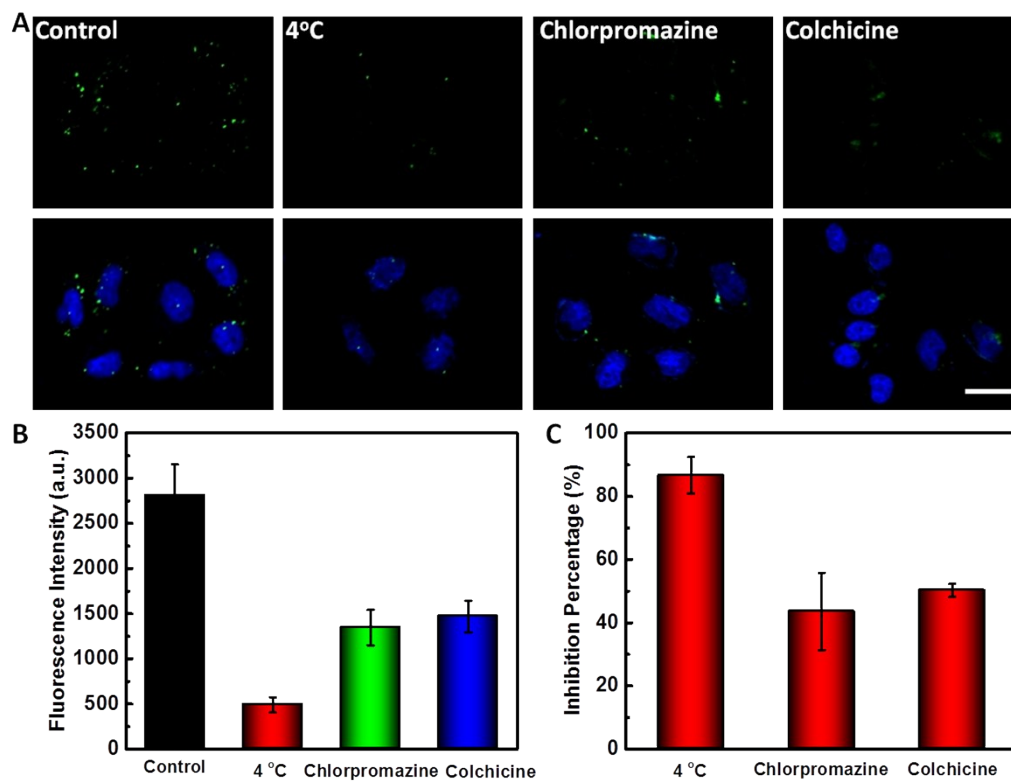

**Fig. S8** (A) The CLSM images of MCF-7 cells incubated with FAM-labeled AuDH. MCF-7 without any treatment was regarded as control. (B) The corresponding fluorescence intensities of MCF-7 cells incubated with FAM-labeled AuDH. (C) The inhibition effect of low temperature (4°C), chlorpromazine and colchicine on the cellular uptake of FAM-labeled AuDH.

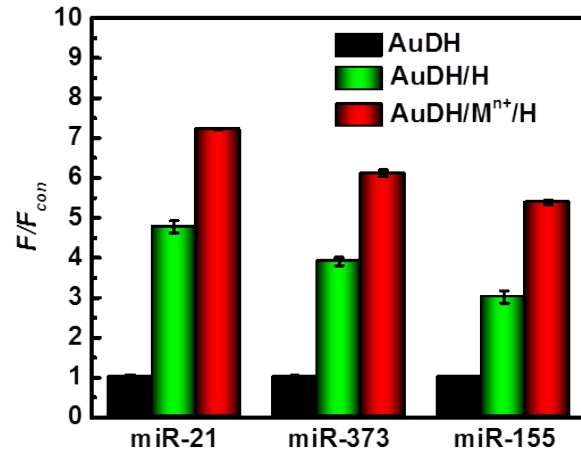

**Fig. S9** The corresponding fluorescence intensities of the AuDH, AuDH/H and AuDH/M<sup>n+</sup>/H in MCF-7 cells.
